# Supplementary material for: Prediction of Grade Reclassification of Prostate Cancer Patients on Active Surveillance through the Combination of a Three-miRNA Signature and Selected Clinical Variables
Source: MDPI journal article supplement (doi:10.3390/cancers13102433), 2021-05-18
Supplement: s1 [file s1]

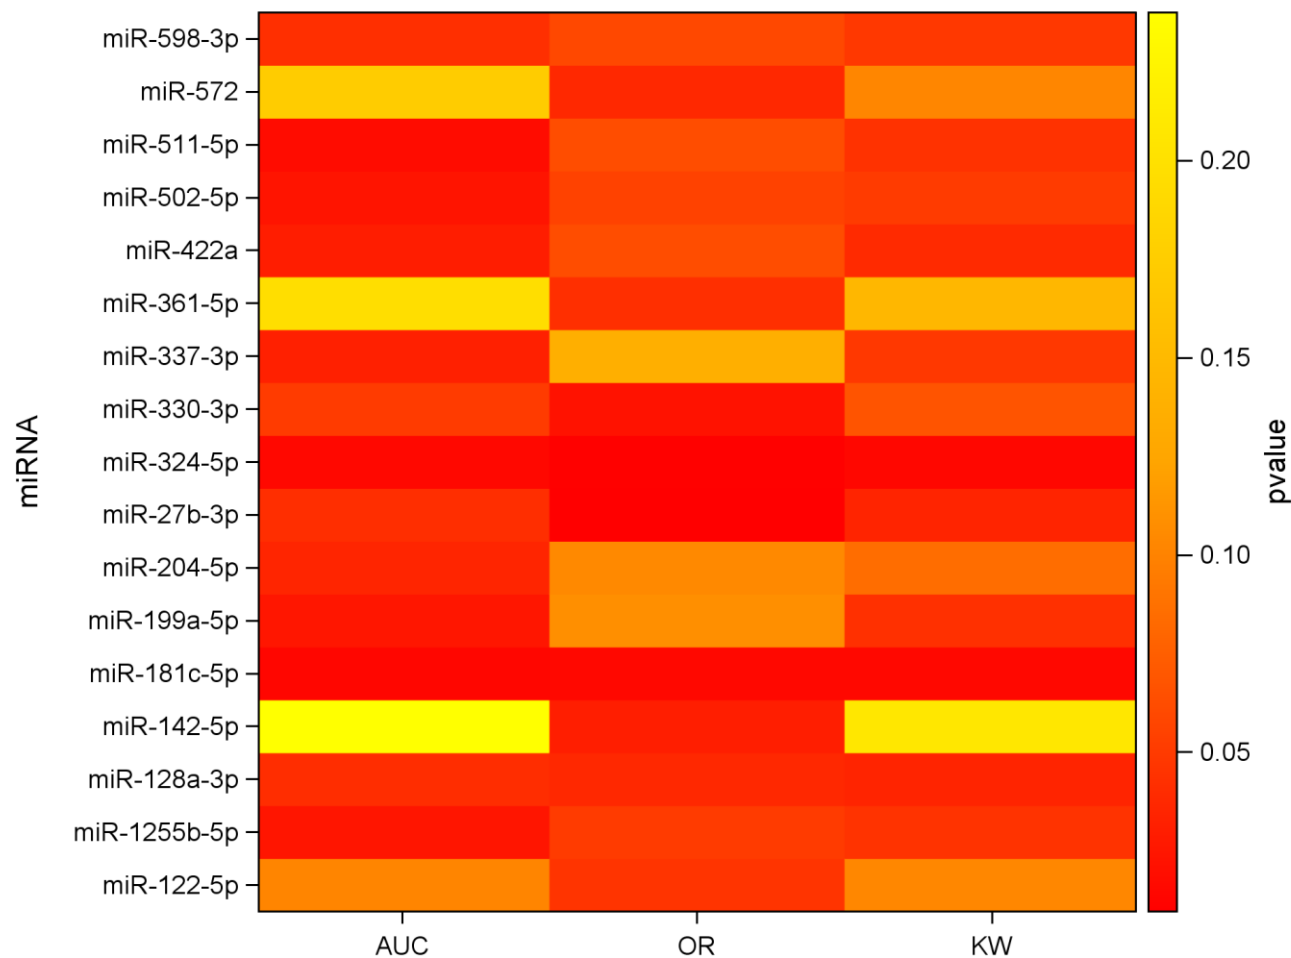

**Supplementary Figure 1**

**Supplementary Figure 1.** Heatmap depicting the level of significance of the candidate miRNAs arising from the different univariate analysis in the TRS. Color intensity is proportional to the significance, from the lowest p-value (red), to the highest p-value (yellow). AUC: area under the curve; OR: odds ratio; KW: Kruskal-Wallis test.

A

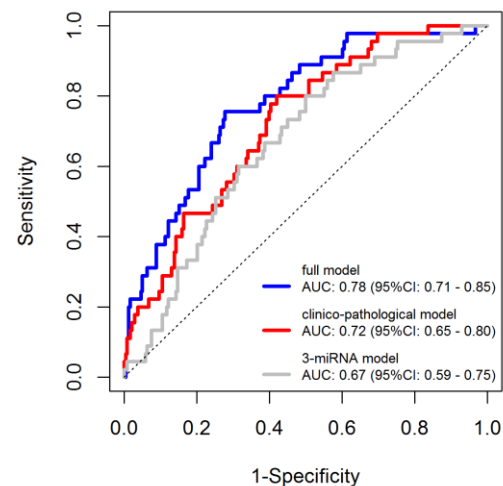

B

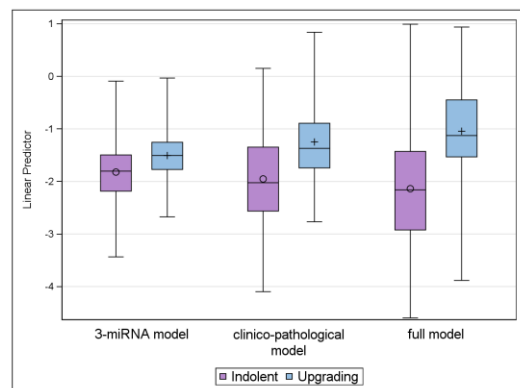

C

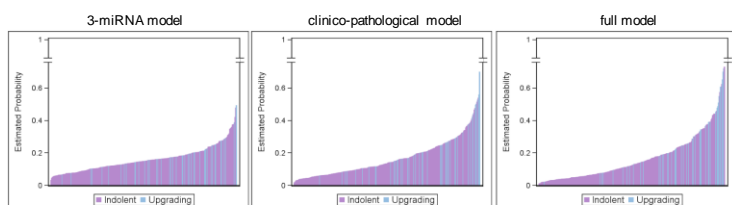

## Supplementary Figure 2

**Supplementary Figure 2.** Results obtained by considering all the available variables in the clinico-pathological model.

**(A)** ROC curves in the overall series of AS patients. ROC curves from 3-miRNA (gray line), clinico-pathological (red line) and full (blue line) models. **(B)** Distribution of the linear predictors estimated for the 3 fitted models according to the upgrading (light-blue) and indolent (purple) status, in the overall series. Each box indicates the 25<sup>th</sup> and 75<sup>th</sup> percentiles. The horizontal line inside the box indicates the median, and whiskers indicate the extreme measured values. **(C)** Bar plots showing the estimated probabilities for each patient according to the upgrading (light-blue) and indolent (purple) status for the 3 fitted models (from left to right: 3-miRNA, clinico-pathological and full model, respectively).
