# Supplementary material for: Prediction of Grade Reclassification of Prostate Cancer Patients on Active Surveillance through the Combination of a Three-miRNA Signature and Selected Clinical Variables
Source: MDPI journal article supplement (doi:10.3390/cancers13102433), 2021-05-18
Supplement: s1 [file s1]

**Supplementary Table 1 – Inclusion criteria, follow-up schedule, and indications for discontinuation of Active Surveillance protocols at Istituto Nazionale Tumori, Milan**

| <b>Inclusion criteria</b>                                    |                                                                                                                                                                                                                                                                                                                                                 |
|--------------------------------------------------------------|-------------------------------------------------------------------------------------------------------------------------------------------------------------------------------------------------------------------------------------------------------------------------------------------------------------------------------------------------|
| PSA                                                          | < 10 ng/ml                                                                                                                                                                                                                                                                                                                                      |
| Clinical stage                                               | ≤ T2c                                                                                                                                                                                                                                                                                                                                           |
| Gleason Pattern Score (GPS)/<br>Prognostic Grade Group (PGG) | GPS=3+3/PGG1 OR<br>GPS=3+4/PGG2 in age > 70 years, tumor involving < 10% core length                                                                                                                                                                                                                                                            |
| Number of positive cores                                     | ≤ 2 OR<br>≤ 15% of all cores in case of saturation biopsy (> 20 cores) with a maximum of 4 OR<br>≤ 25% positive cores AND maximum tumor length in positive cores ≤ 50%                                                                                                                                                                          |
| PSA density                                                  | < 0.2 ng/ml/cm <sup>3</sup> OR no limit on PSA density                                                                                                                                                                                                                                                                                          |
| <b>Follow-up schedule</b>                                    |                                                                                                                                                                                                                                                                                                                                                 |
| PSA measurement                                              | Every 3 months                                                                                                                                                                                                                                                                                                                                  |
| Digital rectal examination (DRE)                             | Every 6 months                                                                                                                                                                                                                                                                                                                                  |
| Re-biopsy                                                    | 1, (2), 4 and 7 years after diagnostic biopsy                                                                                                                                                                                                                                                                                                   |
| <b>Indications for AS discontinuation</b>                    |                                                                                                                                                                                                                                                                                                                                                 |
|                                                              | Any one of the following: <ul style="list-style-type: none"> <li>▪ PSA doubling time &lt; 3 years;</li> <li>▪ Clinical stage &gt; T2c at DRE;</li> <li>▪ 2 positive cores OR &gt; 25% positive cores OR maximum tumor length in positive cores &gt; 50% (upsizing) at rebiopsy;</li> <li>▪ GPS &gt; 6/≥PGG2 (upgrading) at re-biopsy</li> </ul> |

**Supplementary Table 2 – Pair-wise relationships of the available clinico-pathological variables.**

| <b>Variables</b>                          | <b>Age (yrs)</b> | <b>PSA density (ng/ml/cm<sup>3</sup>)</b> | <b>Prostate volume (cm<sup>3</sup>)</b> | <b>Positive cores (n)</b> | <b>Positive cores (%)</b> | <b>Max PCa length (%)</b> |
|-------------------------------------------|------------------|-------------------------------------------|-----------------------------------------|---------------------------|---------------------------|---------------------------|
| <b>Age (yrs)</b>                          |                  | -0.14(-0.25; -0.04)*                      | <i>0.0010 †</i>                         | 0.4565 †                  | 0.1888 †                  | 0.14 (0.03; 0.24)*        |
| <b>PSA density (ng/ml/cm<sup>3</sup>)</b> |                  |                                           | <i>&lt;.0001 †</i>                      | 0.8729 †                  | 0.1282 †                  | -0.01(-0.11; 0.10)*       |
| <b>Prostate volume (cm<sup>3</sup>)</b>   |                  |                                           |                                         | 0.4233 **                 | 0.8023 **                 | 0.2567 †                  |
| <b>Positive cores (n)</b>                 |                  |                                           |                                         |                           | <i>&lt;.0001 **</i>       | <i>&lt;.0001 †</i>        |
| <b>Positive cores (%)</b>                 |                  |                                           |                                         |                           |                           | <i>&lt;.0001 †</i>        |
| <b>Max PCa length (%)</b>                 |                  |                                           |                                         |                           |                           |                           |

Age: age at biopsy; PSA density: PSA/Volume (on logarithmic scale); Volume: Prostatic volume [dichotomized as <50cc vs ≥50cc]; Positive cores (n): number of positive cores at diagnostic biopsy [dichotomized as ≤1 vs >1]; Positive cores (%): % positive cores at diagnostic biopsy [dichotomized as <10% vs ≥10%], Max PCa length (%): maximum length of prostate cancer in positive core.

\*Spearman correlation coefficient and 95%CI<sub>BCa</sub>; \*\* $\chi^2$  p-value; † non parametric Kruskal-Wallis p-value; significant association or relevant correlations are highlighted in italics.
